# Supplementary figures and images for: Electronic origin of the dependence of hydrogen bond strengths on nearest-neighbor and next-nearest-neighbor hydrogen bonds in polyhedral water clusters (H2O)n, n = 8, 20 and 24
Source: Royal Society of Chemistry journal article supplement (doi:10.1039/c6cp02487d), 2016-01-01

# Stick – Ball figures of cubic isomers ( $\text{H}_2\text{O}$ )<sub>8</sub> ( See Figure 2)

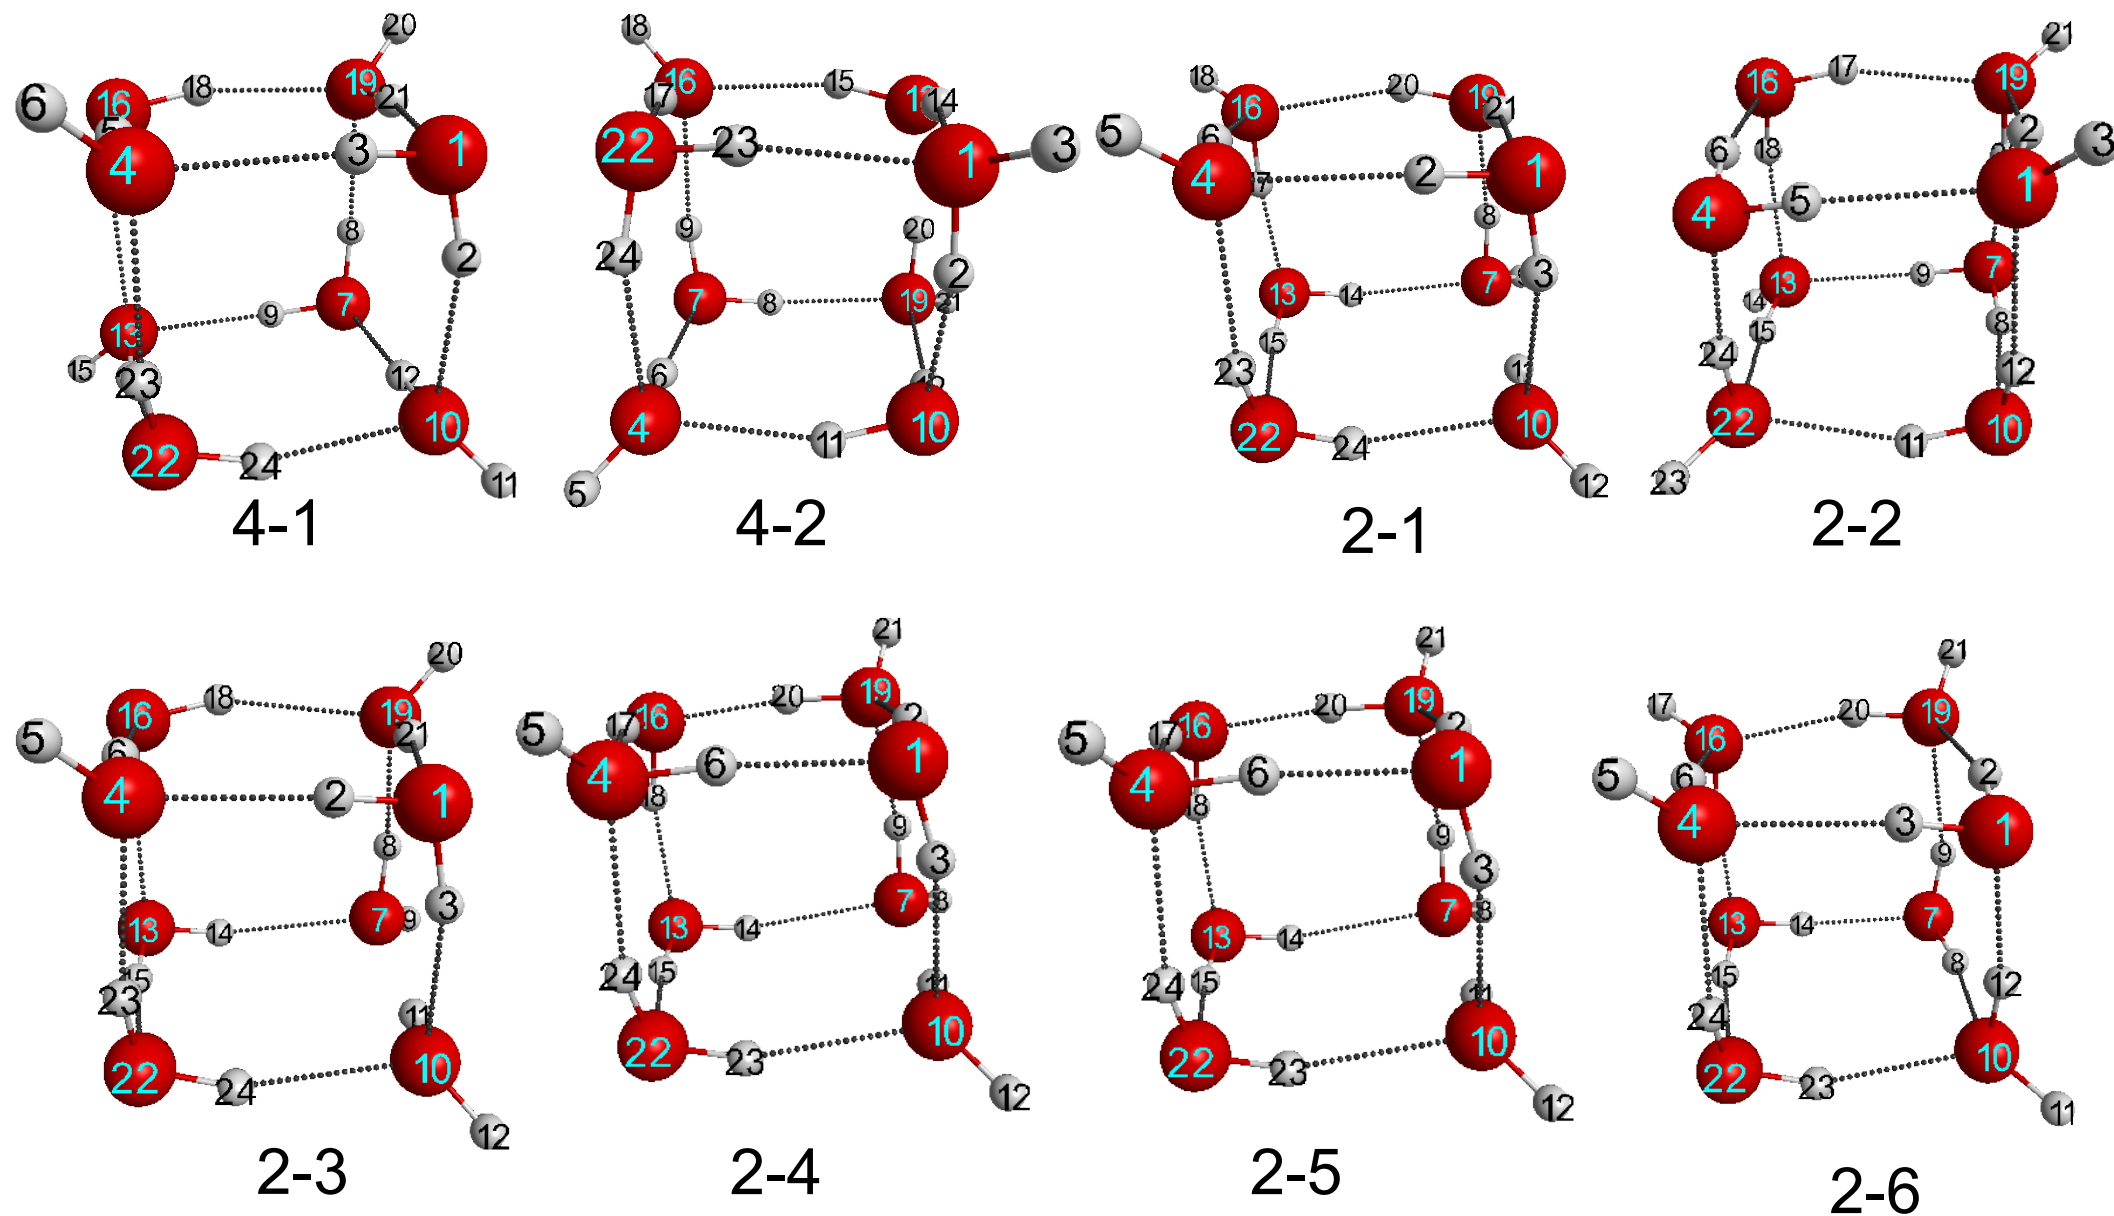

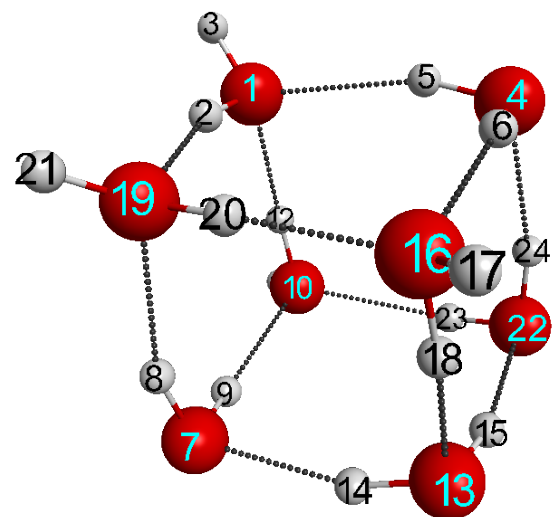

1-1

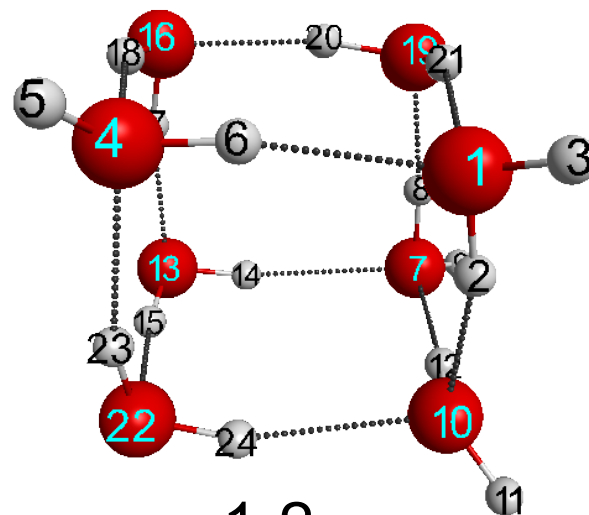

1-2

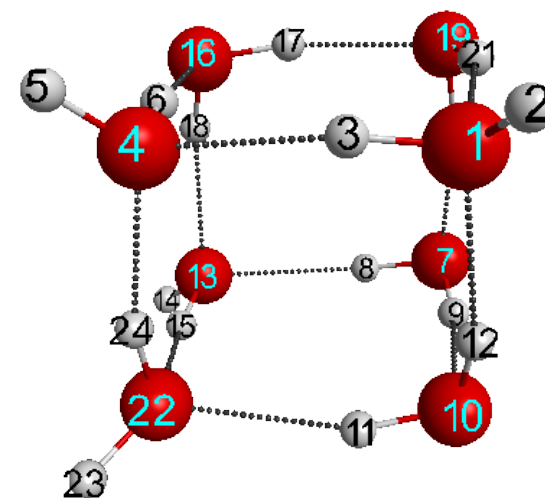

1-3

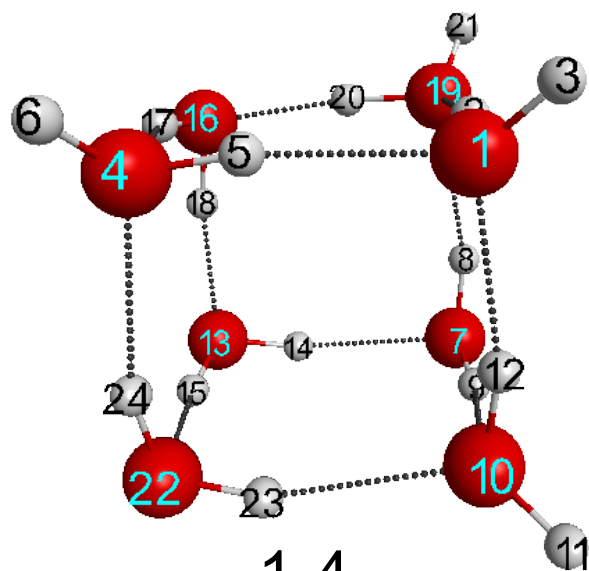

1-4

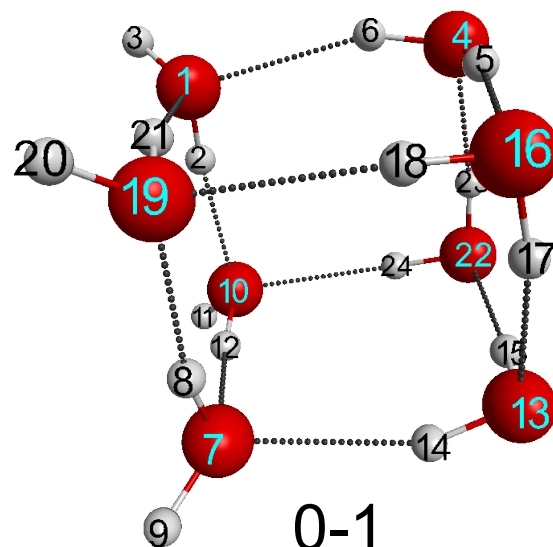

0-1

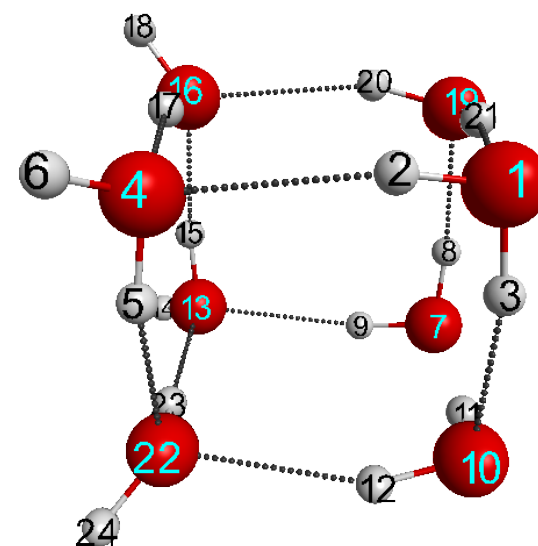

0-2

Supplement: c6cp02487d1.pdf [file c6cp02487d1.pdf]
